# Supplementary material for: Scalable Preparation and Improved Discharge Properties of FeS2@CoS2 Cathode Materials for High-Temperature Thermal Battery
Source: MDPI journal article supplement (doi:10.3390/nano12081360), 2022-04-15
Supplement: s1 [file s1]

Supplementary Materials

# Scalable Preparation and Improved Discharge Properties of FeS<sub>2</sub>@CoS<sub>2</sub> Cathode Materials for High-Temperature Thermal Battery

Qianqiu Tian <sup>1</sup>, Jing Hu <sup>2,\*</sup>, Shiyu Zhang <sup>1</sup>, Xiaopeng Han <sup>1,3,\*</sup>, Hao Guo <sup>4</sup>, Licheng Tang <sup>4</sup>, Jiajun Wang <sup>1</sup> and Wenbin Hu <sup>1</sup>

- <sup>1</sup> School of Materials Science and Engineering, Tianjin University, Tianjin 300072, China; tianqianqiu@tju.edu.cn (Q.T.); zsy272@tju.edu.cn (S.Z.); wangjjtju@126.com (J.W.); wbhu@tju.edu.cn (W.H.)  
<sup>2</sup> Shandong Engineering Research Center of Green and High-Value Marine Fine Chemical, Weifang University of Science and Technology, Shouguang 262700, China  
<sup>3</sup> Haihe Laboratory of Sustainable Chemical Transformations, Nanjing University, Tianjin 200192, China  
<sup>4</sup> State Key Laboratory of Advanced Chemical Power Sources, Zunyi, 563003, China; guohao\_powersources@outlook.com (H.G.); tcl19851221@163.com (L.T.)  
\* Correspondence: wkhujing@wfust.edu.cn (J.H.); xphan@tju.edu.cn (X.H.)

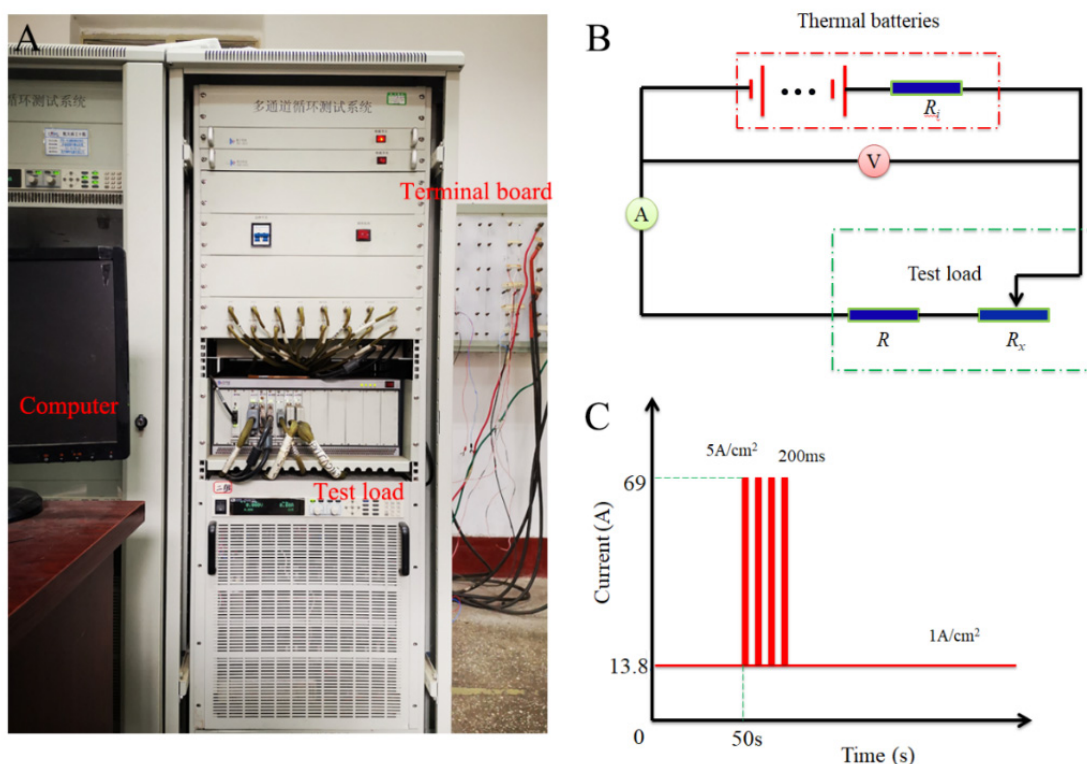

**Figure S1.** (A) Dedicated device for testing the thermal batteries; (B) The test schematic diagram; (C) The discharge test conditions.

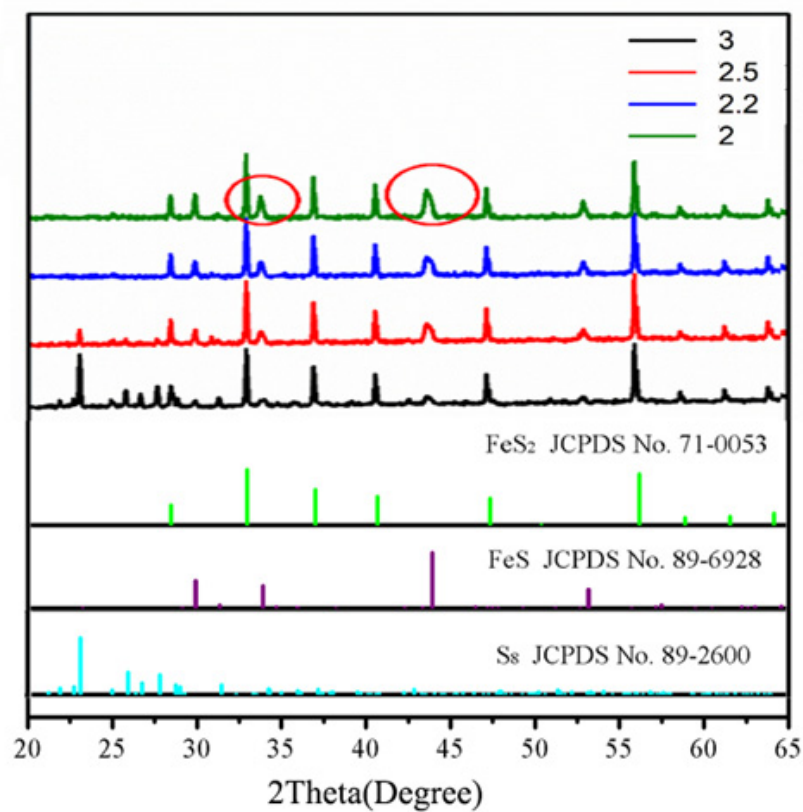

Figure S2. Effect of S/Fe mole ratio on product composition.

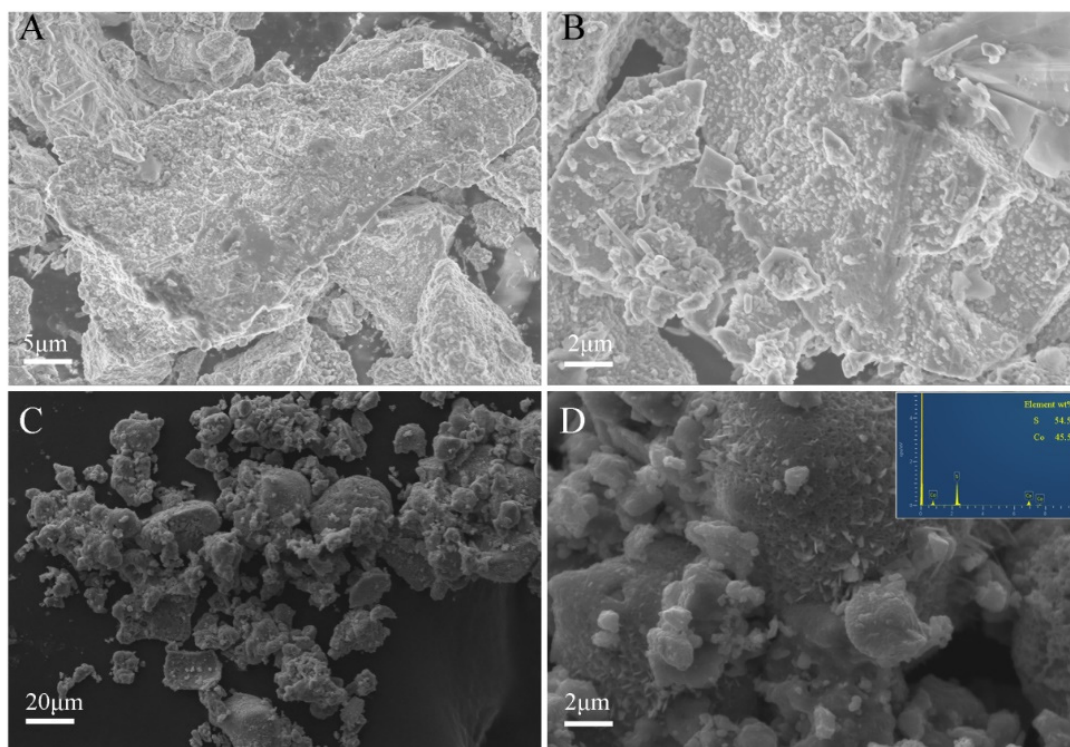

Figure S3. SEM images of (A–B) CoS<sub>2</sub> containing sulfur and (C–D) desulfurized CoS<sub>2</sub>.

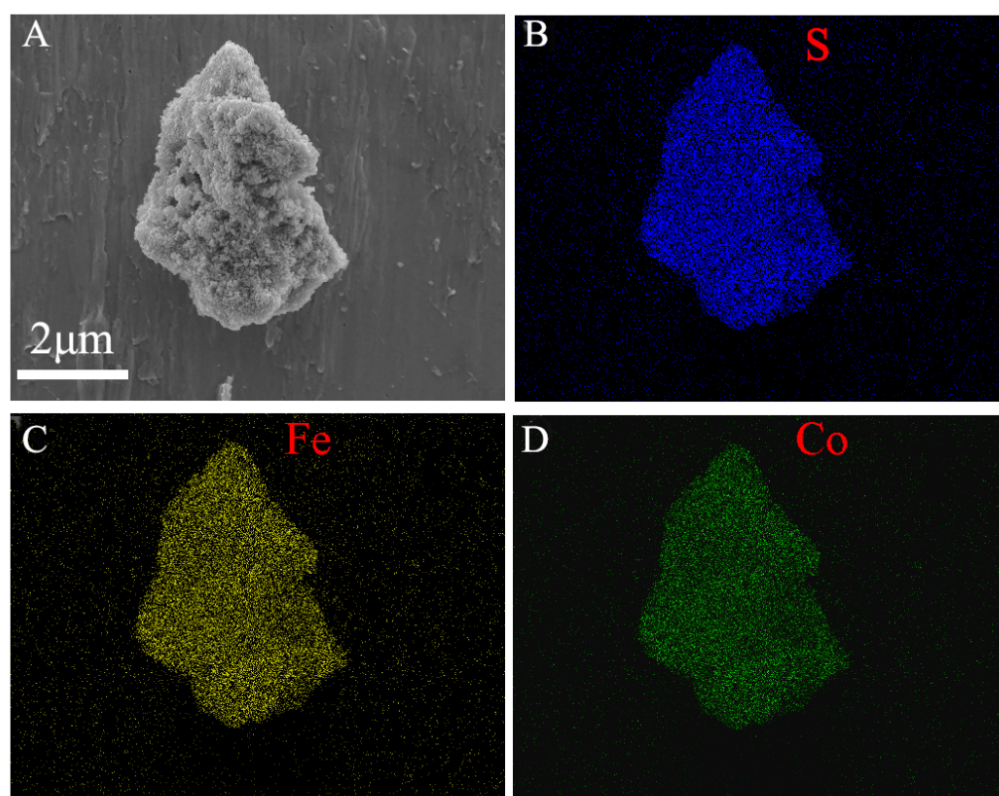

Figure S4. Element mappings of FeS<sub>2</sub>@40%CoS<sub>2</sub>.

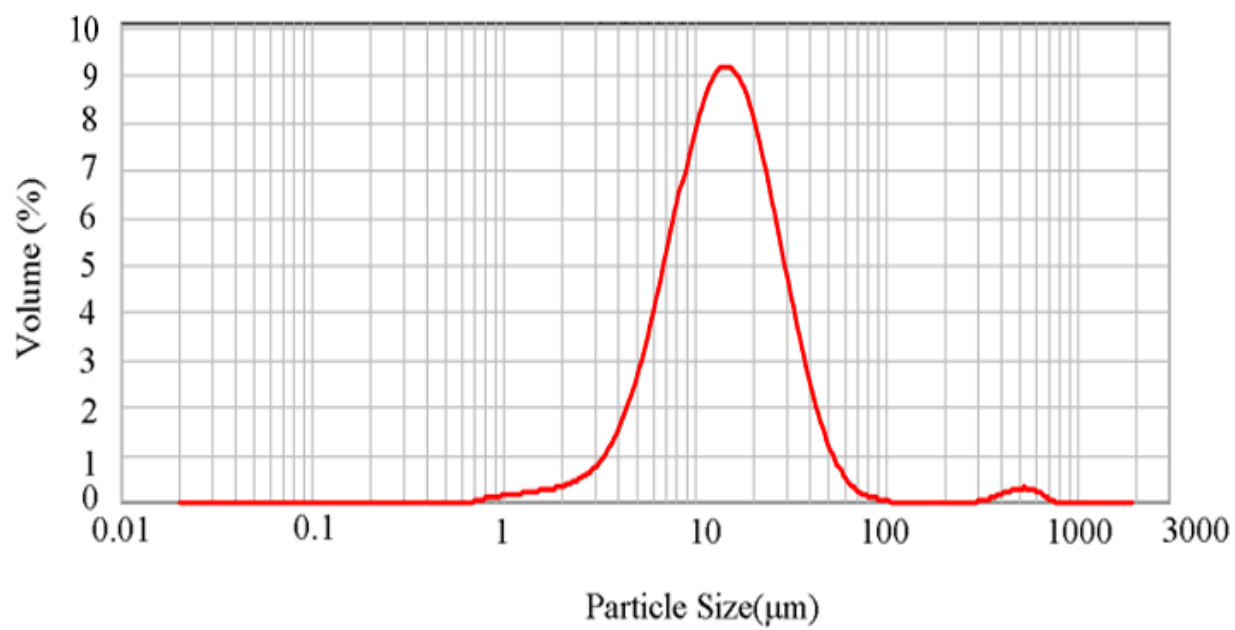

Figure S5. Particle size distribution diagram of FeS<sub>2</sub>@40%CoS<sub>2</sub>.



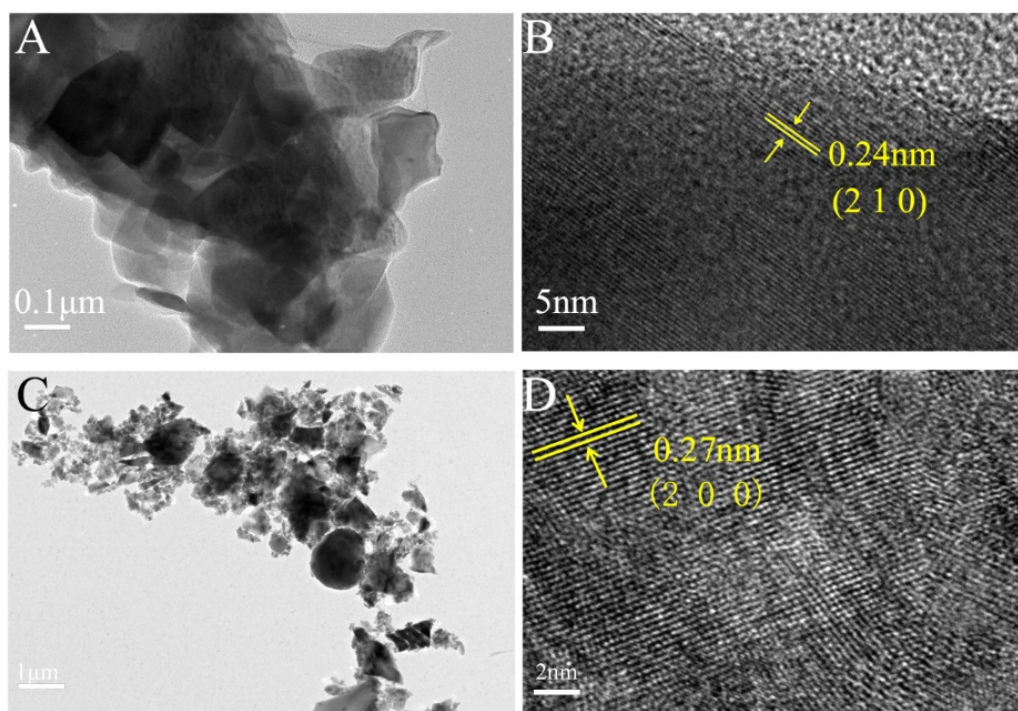

Figure S6. TEM images of (A–B) FeS<sub>2</sub> and (C–D) commercial CoS<sub>2</sub>.

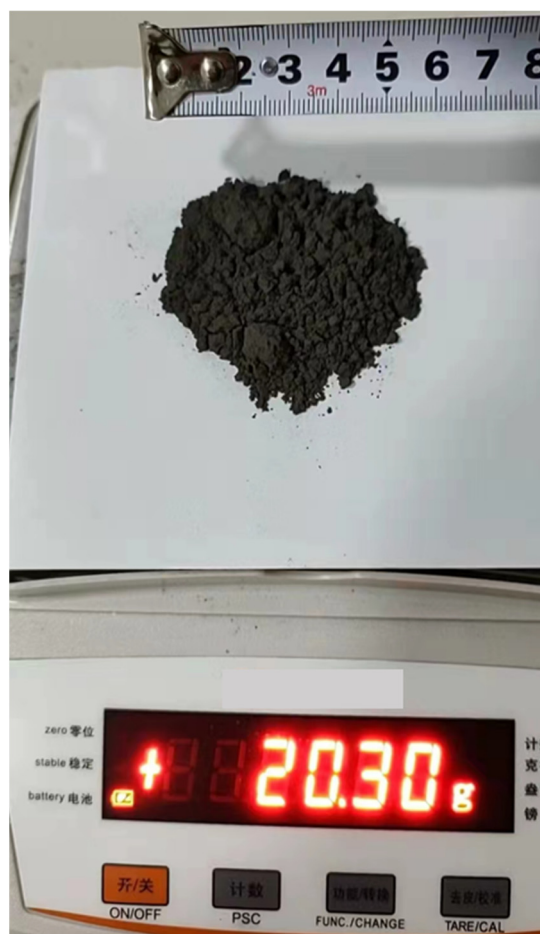

Figure S7. Scalable preparation of FeS<sub>2</sub>@CoS<sub>2</sub> composite with over ten grams.

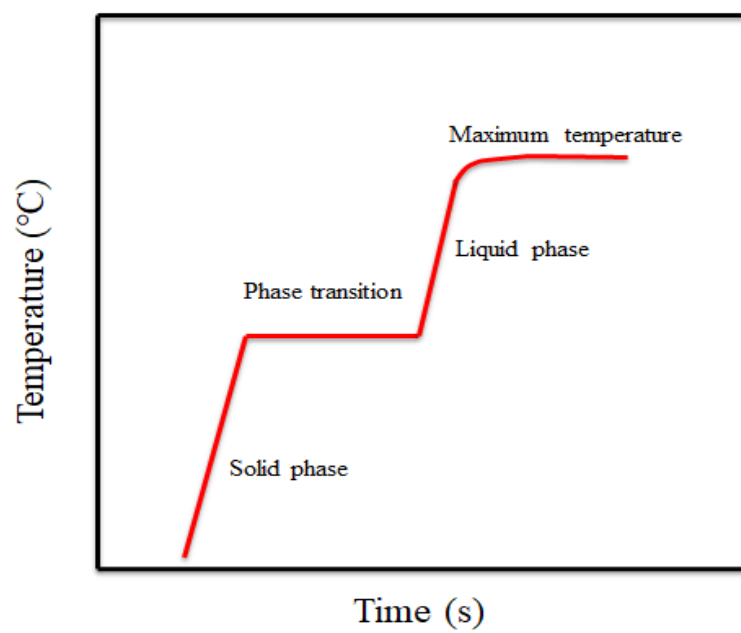

**Figure S8.** Schematic diagram of molten salt temperature rise curve.
